# Supplementary material for: A polydopamine-based platform for anti-cancer drug delivery
Source: Royal Society of Chemistry journal article supplement (doi:10.1039/c8bm01642a), 2019-01-01
Supplement: c8bm01642a1.pdf [file c8bm01642a1.pdf]

# Polydopamine-based Platform for Anti-cancer Drug Delivery

**Rushikesh S. Ambekar<sup>a</sup>, Balasubramanian Kandasubramanian<sup>a,\*</sup>**

<sup>a</sup> **Rapid Prototype & Electrospinning Lab, Department of Metallurgical and Materials Engineering, DIAT (DU), Ministry of Defence, Girinagar, Pune-411025, India.**

**\* Corresponding Author Email: [meetkbs@gmail.com](mailto:meetkbs@gmail.com)**

# Mechanism of Drug Delivery

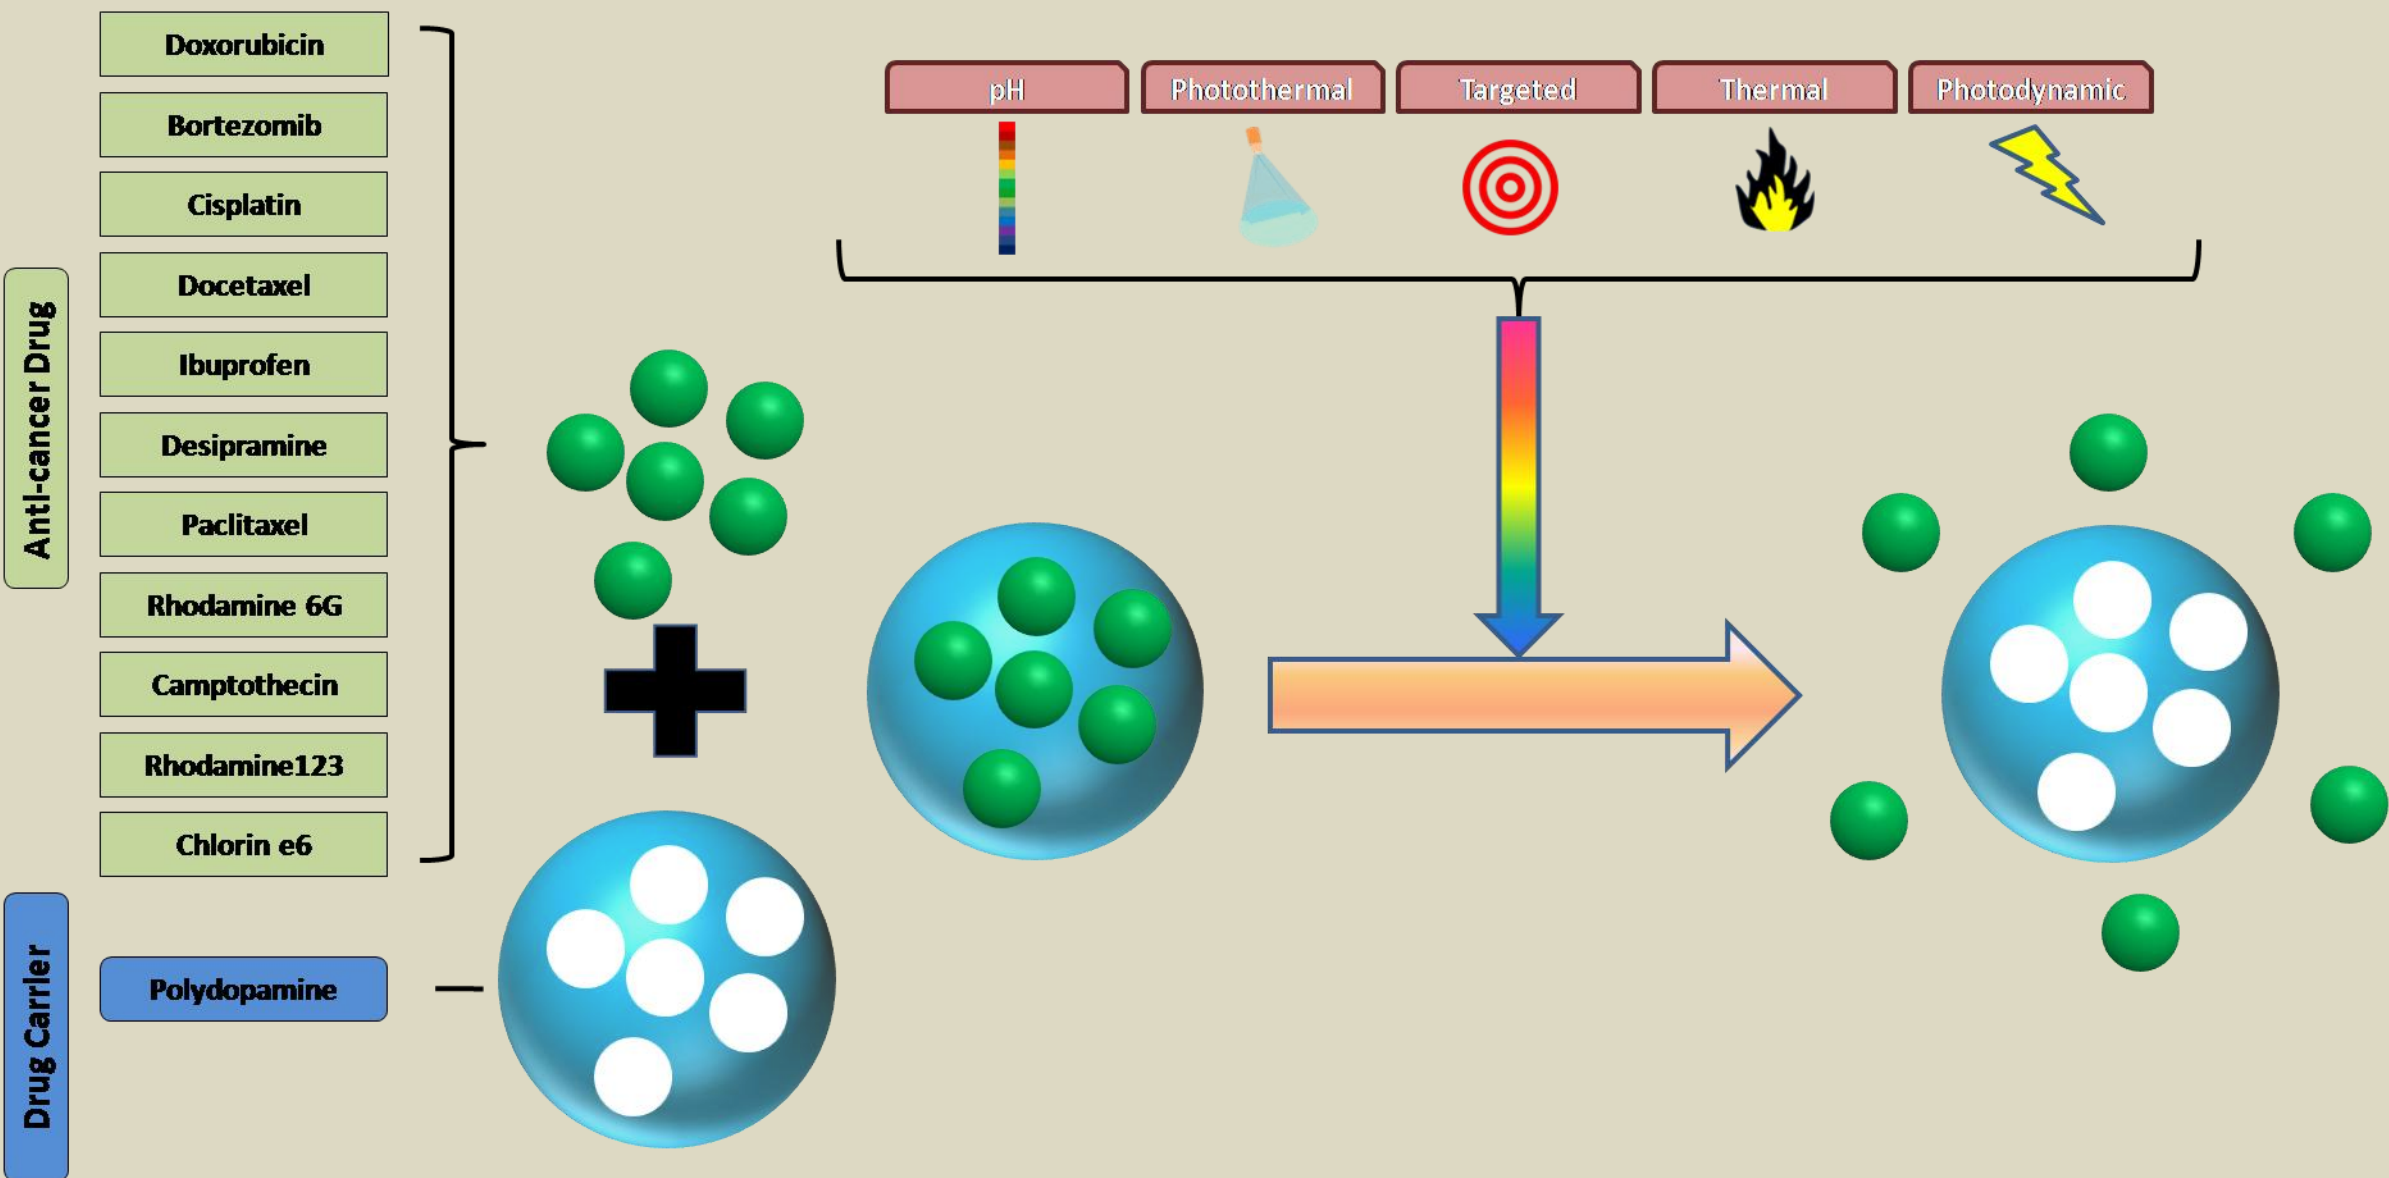

# Classification of Cancer Therapy

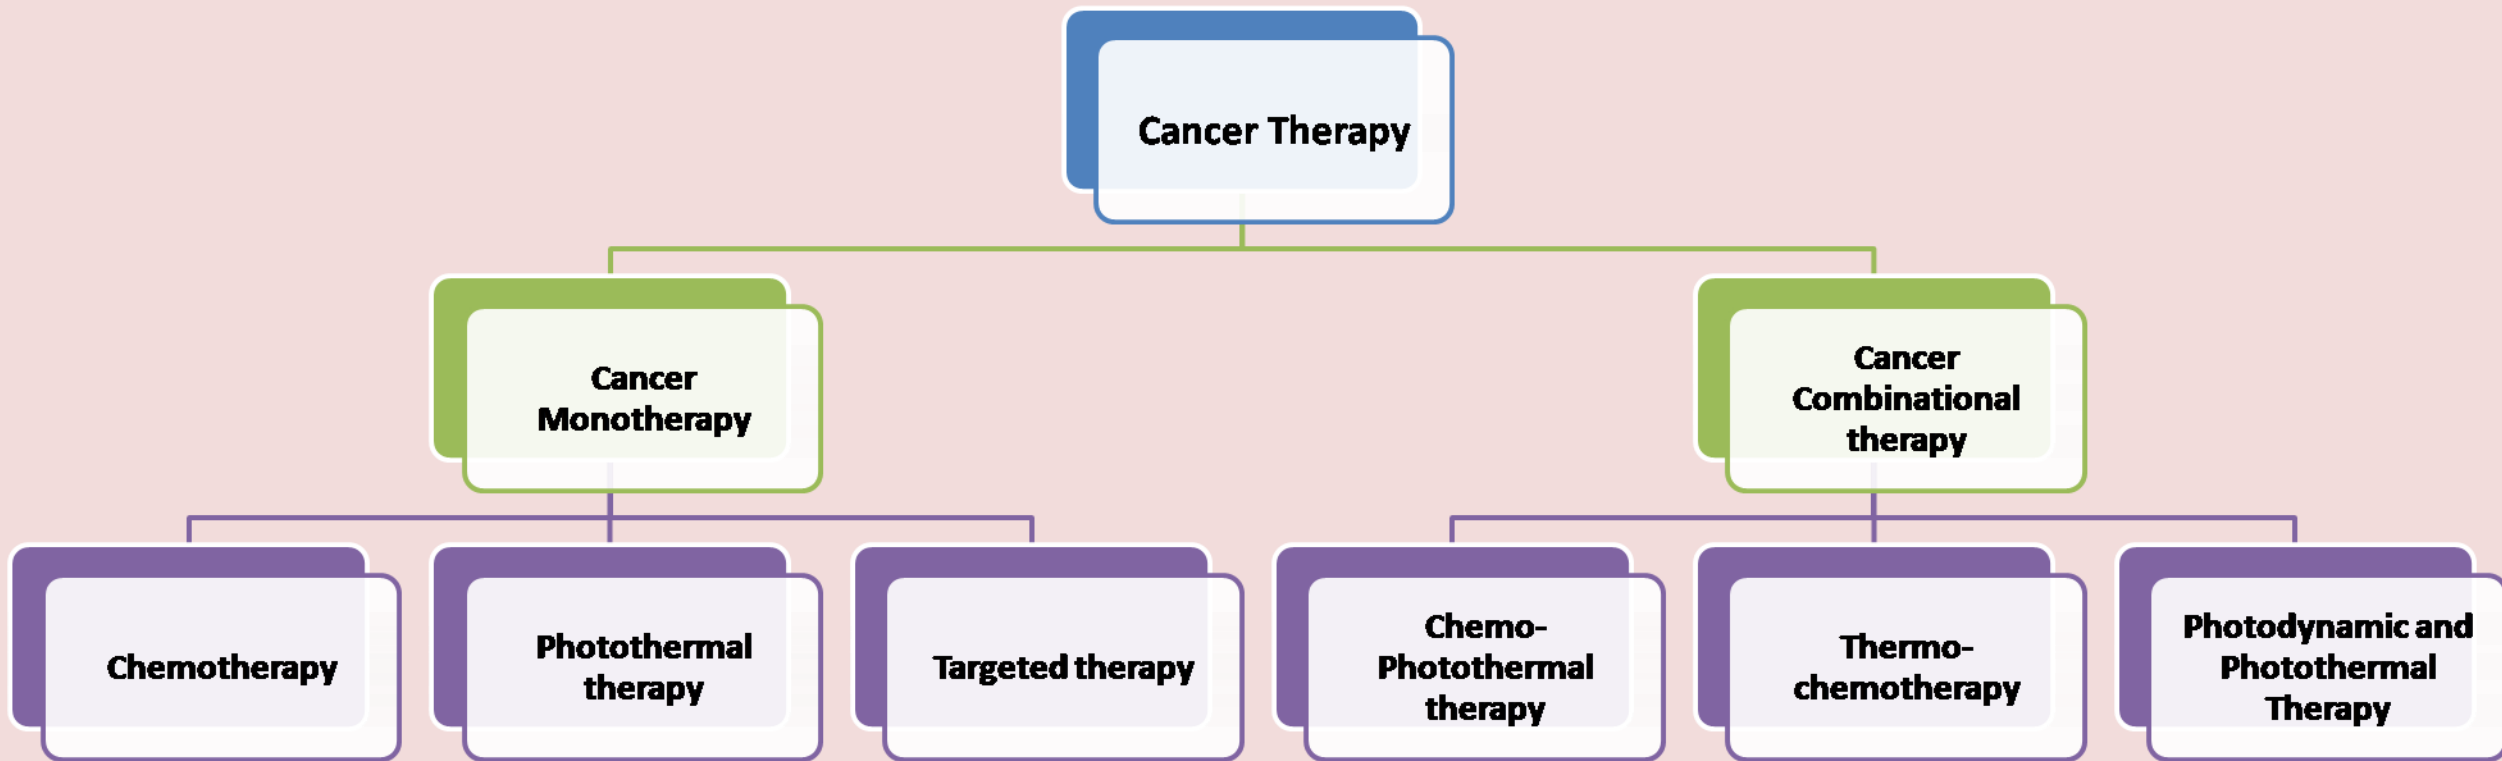

# Cancer Monotherapy

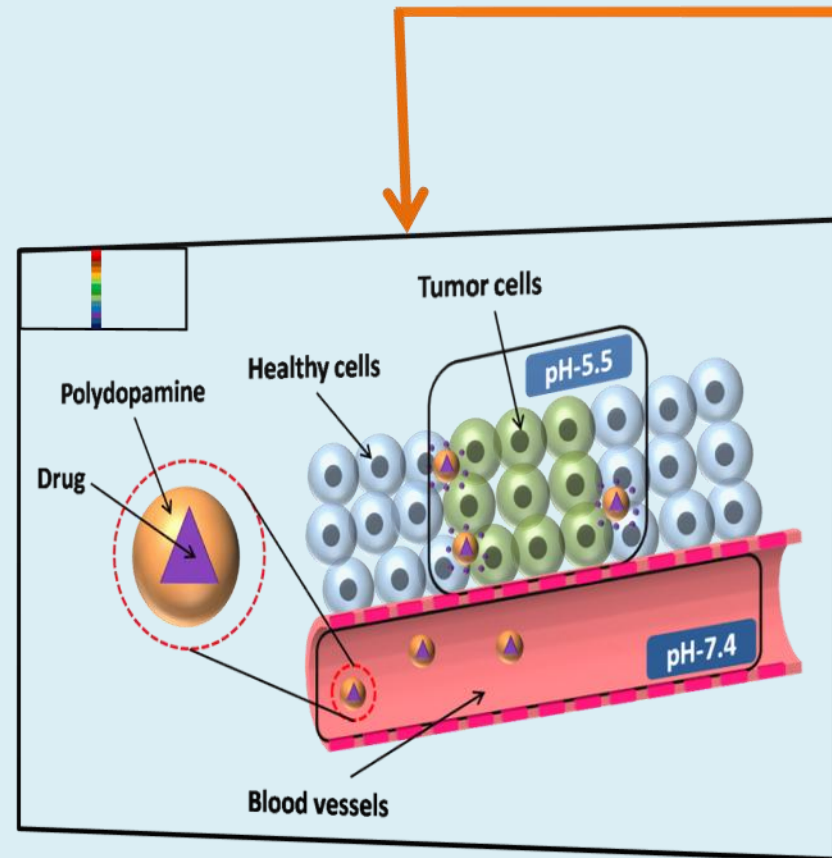

Chemotherapy

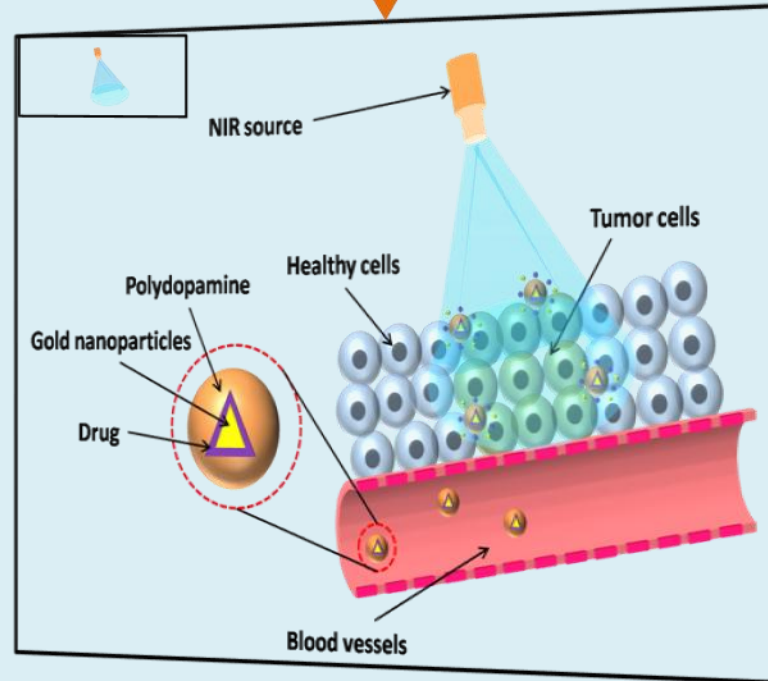

Photothermal Therapy

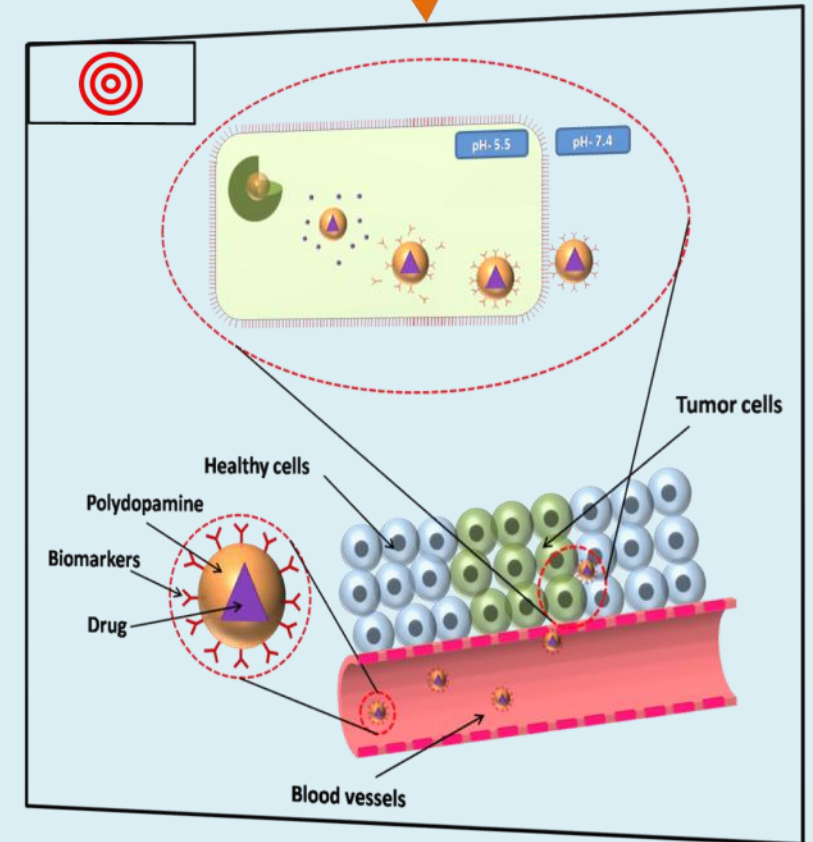

Targeted Therapy



# Cancer Combinational Therapy

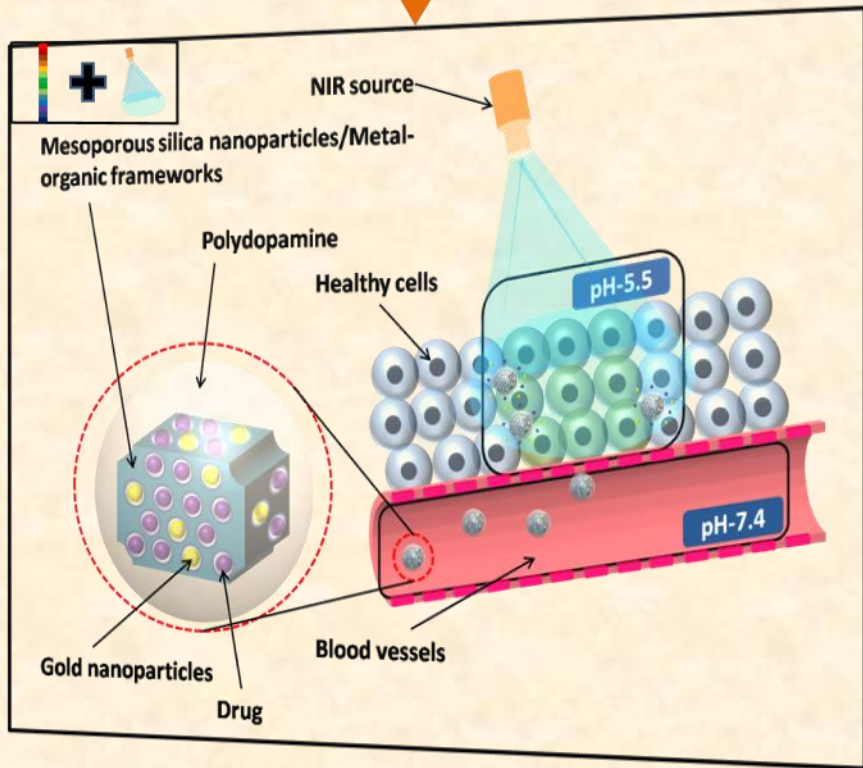

Chemo-Photothermal therapy

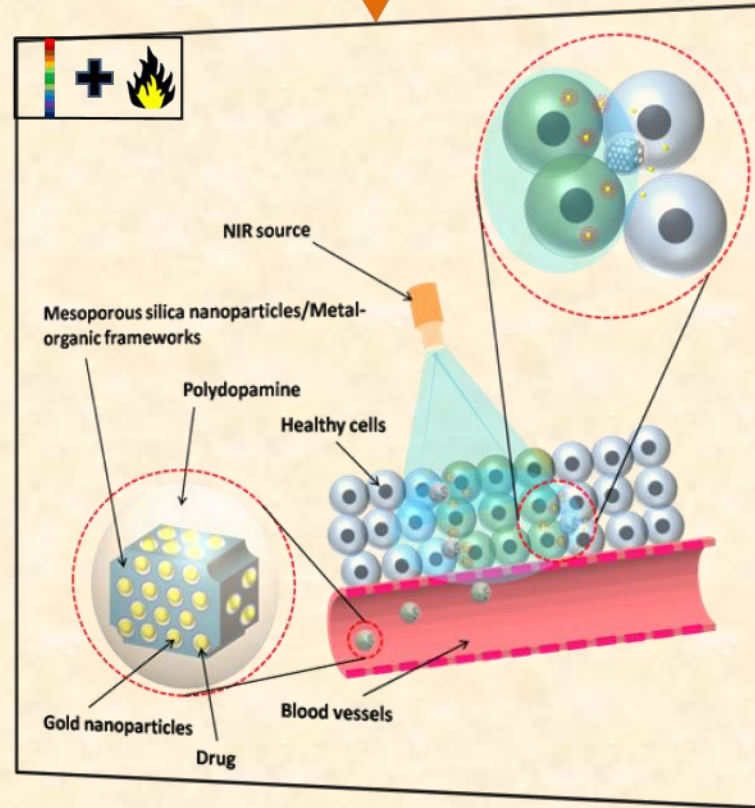

Thermo-Chemotherapy

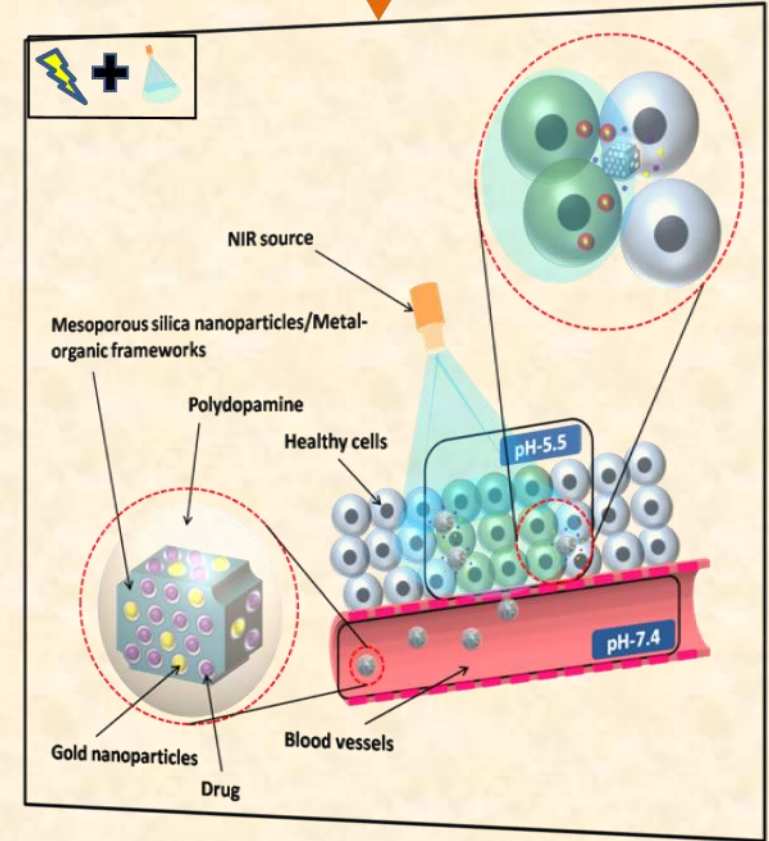

Photodynamic and Photothermal Therapy

**Thank You**
